# Supplementary material
Source: PubMed Central journal article supplement (PMC9133085)
Supplement: NIHMS1770473-supplement-2.pdf [file NIHMS1770473-supplement-2.pdf]

**Figure S1: Flow Diagram**

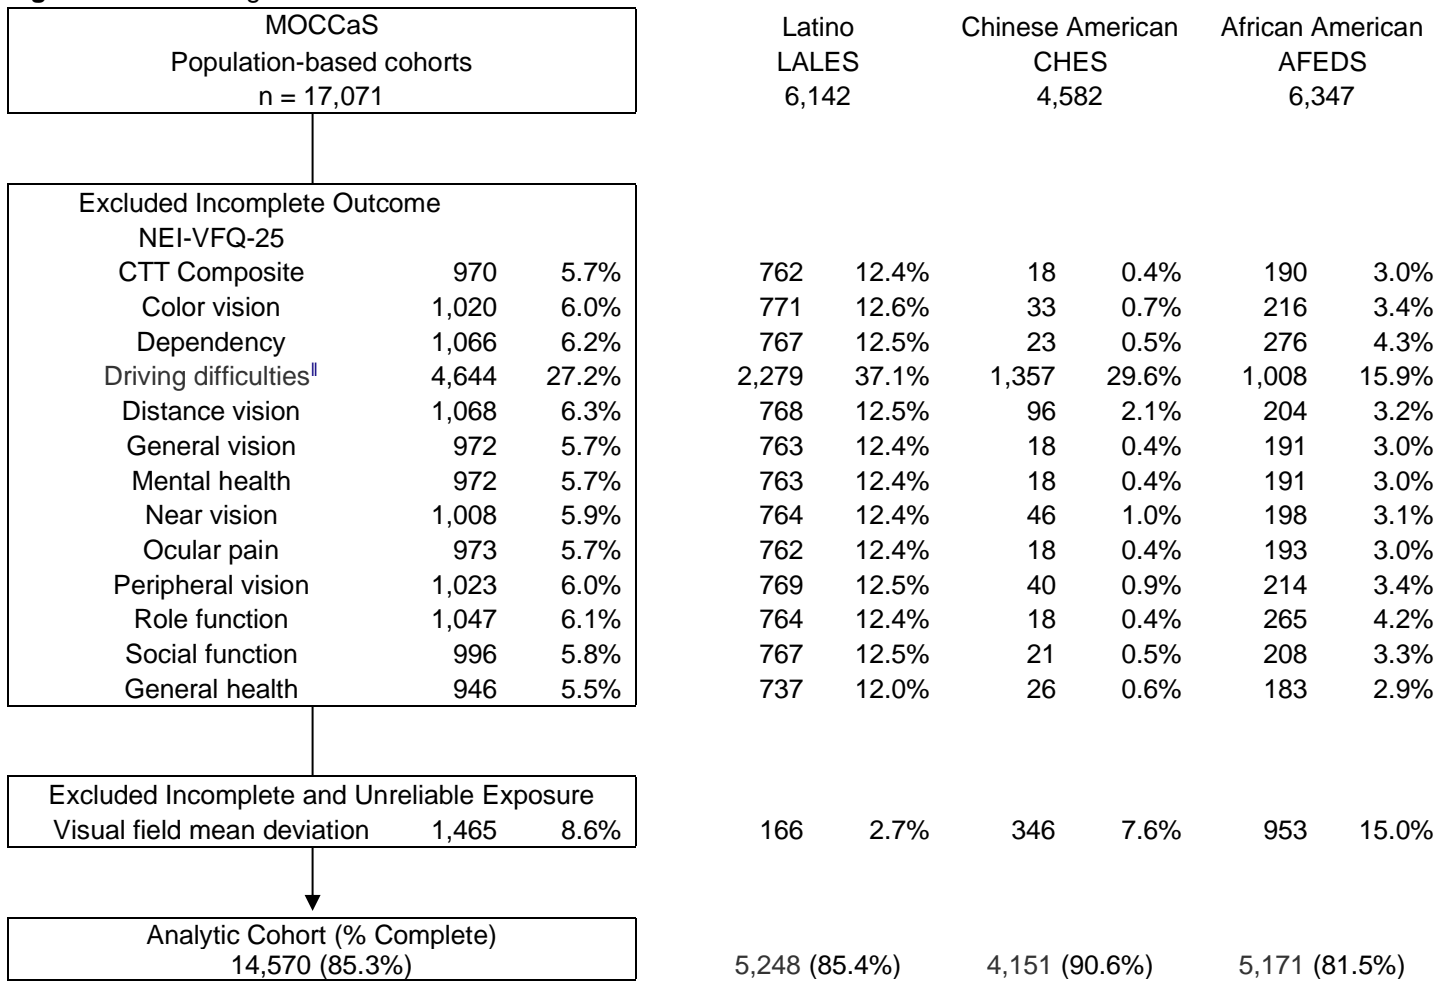

MOCCaS = Multiethnic Ophthalmology Cohorts of California Study; LALES = Los Angeles Latino Eye Study; CHES = Chinese American Eye Study; AFEDS = African American Eye Disease Study; NEI-VFQ-25 = National Eye Institute Visual Function Questionnaire 25-Item; CTT = Classical Test Theory

<sup>¶</sup>The NEI-VFQ-25 instructs participants to omit items related to driving difficulties if they report they are not currently driving and had not driven in the past. Participants with missing subscale scores for driving difficulties are included in the analytic cohort.
