# Supplementary material
Source: PubMed Central journal article supplement (PMC9133085)

**Figure S2: Item response theory diagnostics and factor analysis**

| <i>Descriptive and Fit Statistics</i>           | <b>Task Composite</b> | <b>Well-Being Composite</b> |
|-------------------------------------------------|-----------------------|-----------------------------|
| Mean (Standard Deviation) [0–100 points]        | 83.1 (16.7)           | 71.8 (16.6)                 |
| Log Likelihood                                  | -88216                | -110646                     |
| Cronbach's Alpha Internal Consistency           | 0.888                 | 0.872                       |
| Root Mean Square Error of Residuals             | 0.08                  | 0.08                        |
| Proportion Variance Explained by Single Domain  | 68.3%                 | 64.7%                       |
| Empirical Chi Square Test for Unidimensionality | < 0.001               | < 0.001                     |

**Histogram Distributions**

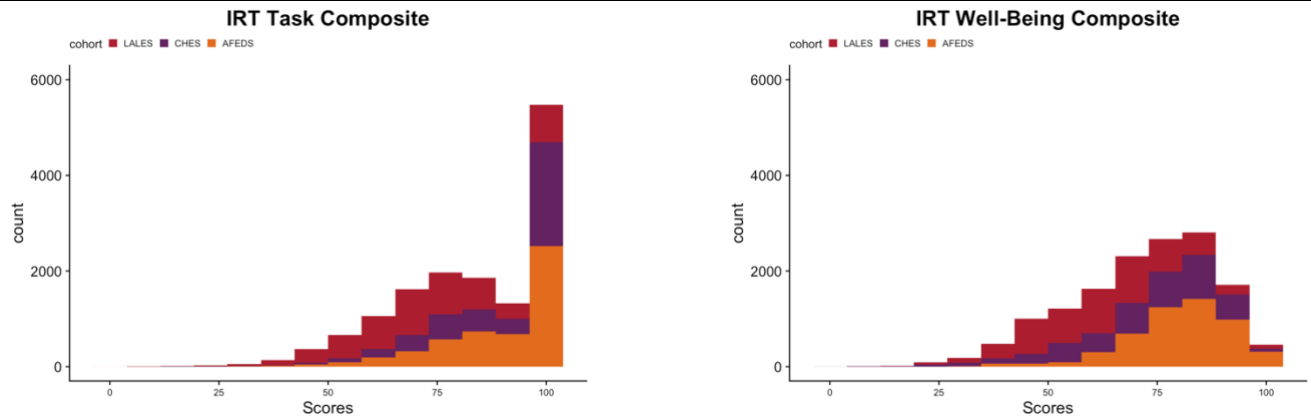

**Test Information Curves (Standardized VSQOL Ability)**

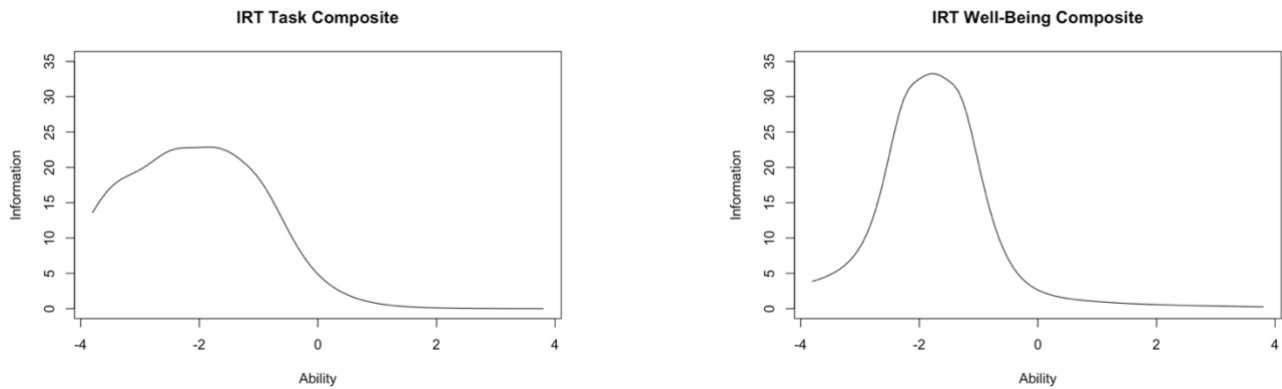

**Scree Plots Assess the Unidimensionality of Item Response Theory Domains**

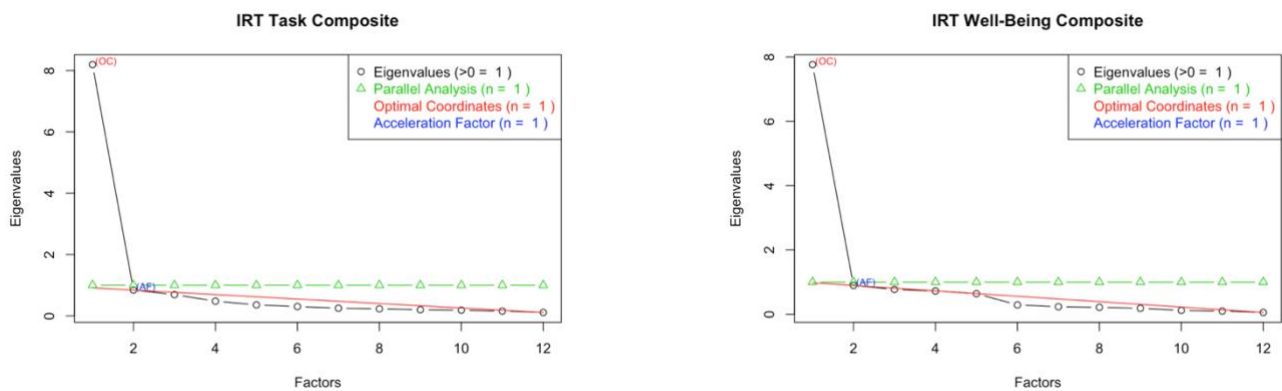

Supplement: NIHMS1770473-supplement-3.pdf [file NIHMS1770473-supplement-3.pdf]
