# Supplementary material
Source: PubMed Central journal article supplement (PMC9133085)
Supplement: NIHMS1770473-supplement-6.pdf [file NIHMS1770473-supplement-6.pdf]

**Figure S5:** LOWESS plot of predicted NEI-VFQ-25 CTT vision-related dependency scores from linear regression on VFL (MD in dB) in the BSE by cohort

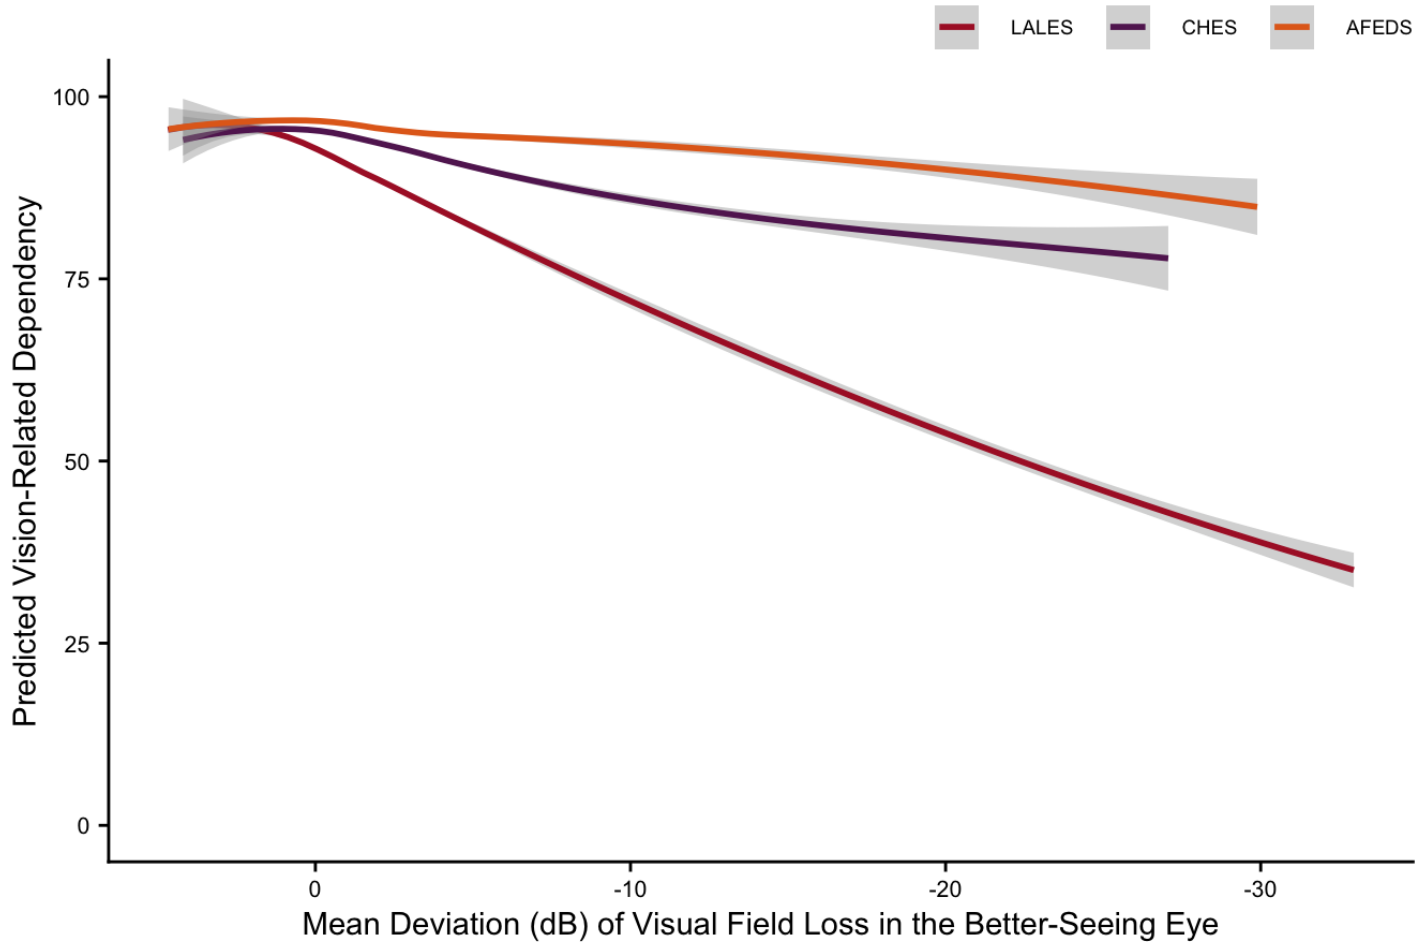

\*Linear Regression of Quality of Life on Visual Field Loss in the Better-Seeing Eye with an Interaction between VFL and Cohort, Adjusted for Visual Impairment, Age, Sex, Born in US, Education, Income, Employment, Health Insurance, Depression, and Number of Comorbidities

LOWESS = Locally Weighted Scatterplot Smoothing; NEI-VFQ-25 = National Eye Institute Visual Function Questionnaire 25-Item; CTT = Classical Test Theory; VFL = Visual Field Loss; MD = Mean Deviation; dB = Decibels; BSE = Better-Seeing Eye

The LOWESS smoothing parameter is 0.6. Gray bars represent 95% confidence limits of the predicted NEI-VFQ-25 IRT composite scores.

Linear regression models were adjusted for race and ethnicity, age, number of comorbidities, sex (female), born in USA (yes), education highest grade obtained), working status (unemployed), income ( $\leq$  \$20,000), has health insurance (yes), presenting binocular visual acuity (LogMAR score), depression (a good bit of the time or more in the last 4 weeks), and an interaction between VFL and race, ethnicity.

LOWESS curves are shown stratified by age  $< 65$  and  $\geq 65$  to illustrate effect modification of VSQOL on VFL by age.
