# Supplementary material
Source: PubMed Central journal article supplement (PMC9133085)
Supplement: NIHMS1770473-supplement-8.pdf [file NIHMS1770473-supplement-8.pdf]

**Table S1:** VSQOL survey instrument: NEI-VFQ-25 items, CTT subscales, and IRT domains

| Code                           | Label                            | Summary                                                                                       | CTT Subscale                   | IRT Domain |
|--------------------------------|----------------------------------|-----------------------------------------------------------------------------------------------|--------------------------------|------------|
| <u>Task Domain Items</u>       |                                  |                                                                                               |                                |            |
| frf_1                          | Accomplish less                  | Accomplish less than you liked?                                                               | Vision-Related Role Function   | Task       |
| frf_2                          | Limited in endurance             | Limited in how long could work?                                                               | Vision-Related Role Function   | Task       |
| fpv_1                          | Seeing objects off to side       | Difficulty noticing objects while walking                                                     | Peripheral Vision              | Task       |
| fnv_1                          | Reading normal newspapers        | Difficulty read ordinary print                                                                | Near Vision                    | Task       |
| fnv_2                          | Seeing well up close             | Difficulty work needs see well up close                                                       | Near Vision                    | Task       |
| fnv_3                          | Finding objects on crowded shelf | Difficulty find things on a crowded shelf                                                     | Near Vision                    | Task       |
| fdv_1                          | Reading street signs             | Difficulty read street signs/store names                                                      | Distance Vision                | Task       |
| fdv_2                          | Going down stairs at night       | Difficulty go down steps in dim light                                                         | Distance Vision                | Task       |
| fdv_3                          | Going out to movies/plays        | Difficulty going out to see movies, plays                                                     | Distance Vision                | Task       |
| fcv_1                          | Difficulty matching clothes      | Difficulty picking out/matching own clothes                                                   | Color Vision                   | Task       |
| fdr_1                          | Daylight driving                 | Difficulty driving at daytime in familiar places                                              | Driving Difficulties           | Task       |
| fdr_2                          | Nighttime driving                | Difficulty driving at night                                                                   | Driving Difficulties           | Task       |
| fdr_3*                         | Difficult conditions driving     | Difficulty driving in difficult conditions<br>(bad weather, rush hour, freeway, city traffic) | NA                             | NA         |
| <u>Well-Being Domain Items</u> |                                  |                                                                                               |                                |            |
| fmh_1                          | Worry                            | How much do you worry eyesight?                                                               | Vision-Related Mental Health   | Well-Being |
| fmh_2                          | Frustrated                       | Feel frustrated a lot due eyesight                                                            | Vision-Related Mental Health   | Well-Being |
| fmh_3                          | No control                       | Have much less control due eyesight                                                           | Vision-Related Mental Health   | Well-Being |
| fmh_4                          | Embarrassment                    | Worry about doing things embarrass myself                                                     | Vision-Related Mental Health   | Well-Being |
| fgv_1                          | General vision                   | At present time, your eyesight is                                                             | General Vision                 | Well-Being |
| fdp_1                          | Stay home most of time           | Stay home most of time due eyesight                                                           | Vision-Related Dependency      | Well-Being |
| fdp_2                          | Rely too much on others' word    | Rely too much on what others tell me                                                          | Vision-Related Dependency      | Well-Being |
| fdp_3                          | Need much help from others       | Need a lot of help from others                                                                | Vision-Related Dependency      | Well-Being |
| fsf_1                          | Seeing how people react          | Difficulty see how people react to things                                                     | Vision-Related Social Function | Well-Being |
| fsf_2                          | Visiting others                  | Difficulty visiting people in their home/party                                                | Vision-Related Social Function | Well-Being |
| fop_1                          | Amount pain                      | How much of pain/discomfort in eyes?                                                          | Ocular Pain                    | Well-Being |
| fop_2                          | Amount time pain                 | Pain in eyes keep you from doing you like?                                                    | Ocular Pain                    | Well-Being |
| <u>General Health Item</u>     |                                  |                                                                                               |                                |            |
| fgh_1                          | General health                   | In general, would you say your health is?<br>1 Excellent, 2 Very good, 3 Good, 4 Fair, 5 Poor | General Health                 | NA         |
| <u>Driving Filter Items</u>    |                                  |                                                                                               |                                |            |
| curdr                          | Currently driving                | Are you currently driving, at least once in a while?                                          | NA                             | NA         |
| pastdr                         | Ever driven                      | If No, have you never driven a car or have you given up driving?                              | NA                             | NA         |
| r_gvup                         | Reason quit driving              | If gave up driving, was that mainly because of your eyesight?                                 | NA                             | NA         |

VSQOL = Vision-Specific Quality of Life; NEI-VFQ-25 = National Eye Institute Visual Function Questionnaire 25-Item; IRT = Item Response Theory; CTT = Classical Test Theory

\*The item for difficult driving conditions was not asked in LALES, and is not included in scoring
