# Supplementary material
Source: PubMed Central journal article supplement (PMC9133085)
Supplement: NIHMS1770473-supplement-9.pdf [file NIHMS1770473-supplement-9.pdf]

**Table S2:** Hierarchical, Linear Regression Modeling for the Association Between VSQOL and VFL in the BSE in MOCCaS\*

| Vision-Specific Quality of Life        | Model 1 Main Effects |                |         | Model 2 Interaction by Racial and Ethnic Cohort |                |         |                            |                             |
|----------------------------------------|----------------------|----------------|---------|-------------------------------------------------|----------------|---------|----------------------------|-----------------------------|
|                                        | $\beta_{MD}$         | (95% CI)       | P-Value | $\beta_{MD}$                                    | (95% CI)       | P-Value | P-Value Interaction (CHES) | P-Value Interaction (AFEDS) |
| <u>Item Response Theory</u>            |                      |                |         |                                                 |                |         |                            |                             |
| Task Composite, IRT <sup>†</sup>       | 0.659                | (0.585, 0.733) | < 0.001 | 0.750                                           | (0.646, 0.854) | < 0.001 | 1.000                      | 0.004                       |
| Well-Being Composite, IRT <sup>‡</sup> | 0.554                | (0.479, 0.630) | < 0.001 | 0.666                                           | (0.560, 0.772) | < 0.001 | 0.990                      | 0.002                       |
| <u>Classical Test Theory</u>           |                      |                |         |                                                 |                |         |                            |                             |
| Overall Composite, CTT <sup>§</sup>    | 0.637                | (0.583, 0.690) | < 0.001 | 0.970                                           | (0.895, 1.045) | < 0.001 | < 0.001                    | < 0.001                     |
| Driving Difficulties <sup>  </sup>     | 1.159                | (1.050, 1.267) | < 0.001 | 1.712                                           | (1.538, 1.886) | < 0.001 | < 0.001                    | < 0.001                     |
| Vision-Related Dependency              | 0.780                | (0.695, 0.866) | < 0.001 | 1.382                                           | (1.263, 1.502) | < 0.001 | < 0.001                    | < 0.001                     |
| Peripheral Vision                      | 0.674                | (0.599, 0.750) | < 0.001 | 1.151                                           | (1.046, 1.257) | < 0.001 | < 0.001                    | < 0.001                     |
| Vision-Related Mental Health           | 0.795                | (0.694, 0.896) | < 0.001 | 1.142                                           | (1.000, 1.283) | < 0.001 | 0.257                      | < 0.001                     |
| Distance Vision                        | 0.669                | (0.599, 0.738) | < 0.001 | 1.101                                           | (1.004, 1.199) | < 0.001 | < 0.001                    | < 0.001                     |
| Vision-Related Role Function           | 0.772                | (0.673, 0.871) | < 0.001 | 1.071                                           | (0.932, 1.210) | < 0.001 | 1.000                      | < 0.001                     |
| Near Vision                            | 0.673                | (0.594, 0.751) | < 0.001 | 0.920                                           | (0.810, 1.030) | < 0.001 | 0.002                      | < 0.001                     |
| Vision-Related Social Function         | 0.493                | (0.441, 0.545) | < 0.001 | 0.911                                           | (0.839, 0.984) | < 0.001 | < 0.001                    | < 0.001                     |
| Color Vision                           | 0.399                | (0.345, 0.454) | < 0.001 | 0.856                                           | (0.780, 0.931) | < 0.001 | < 0.001                    | < 0.001                     |
| Ocular Pain                            | 0.478                | (0.384, 0.573) | < 0.001 | 0.721                                           | (0.588, 0.853) | < 0.001 | 0.257                      | < 0.001                     |
| General Vision                         | 0.419                | (0.338, 0.499) | < 0.001 | 0.287                                           | (0.173, 0.400) | < 0.001 | 0.257                      | 0.004                       |
| <u>General Health Item</u>             |                      |                |         |                                                 |                |         |                            |                             |
| General Health                         | 0.357                | (0.238, 0.476) | < 0.001 | 0.337                                           | (0.170, 0.504) | < 0.001 | 0.271                      | 0.071                       |

VSQOL = Vision-Specific Quality of Life; VFL = Visual Field Loss; BSE = Better Seeing Eye; MOCCaS = Multiethnic Ophthalmology Cohorts of California Study; 95% CI = 95% confidence interval; NEI-VFQ-25 = National Eye Institute Visual Function Questionnaire 25-Item; MD = Mean Deviation; IRT = Item Response Theory; CTT = Classical Test Theory

\*VFL for LALES at baseline is presented as mean deviation score in decibels; VSQOL is assessed by the NEI-VFQ-25. Data are presented as coefficient (95% CI). NEI-VFQ-25 scores are adjusted for age, gender, education, employment status, income, acculturation, co-morbidities, health insurance, vision insurance, and visual acuity impairment. Models 2 and 3 are additionally adjusted for an interaction term by racial and ethnic cohort, where LALES is the baseline. Model 3 is additionally adjusted for age strata, where age < 65 years is the baseline. The Holm method was used to adjust for multiple comparisons for 15 VSQOL outcomes.

<sup>†</sup>IRT Task Composite was calculated from a graded response theory model of 12 items from near vision, distance vision, driving, color vision, peripheral vision, and role difficulties subscales.

<sup>‡</sup>IRT Well-Being Composite was calculated from a graded response model of 12 items from general vision, dependency on others, mental health, ocular pain, and social functioning subscales.

**Table S2, Continued:** Hierarchical, Linear Regression  $\beta$  Coefficients for the Association Between VSQOL and VFL in the BSE in MOCCaS\*

| Vision-Specific Quality of Life        | Model 3 Interaction by Age $\geq$ 65 Years |                |         |                            |                             |                                           |
|----------------------------------------|--------------------------------------------|----------------|---------|----------------------------|-----------------------------|-------------------------------------------|
|                                        | $\beta_{MD}$                               | (95% CI)       | P-Value | P-Value Interaction (CHES) | P-Value Interaction (AFEDS) | P-Value Interaction (Age $\geq$ 65 Years) |
| <u>Item Response Theory</u>            |                                            |                |         |                            |                             |                                           |
| Task Composite, IRT <sup>†</sup>       | 0.687                                      | (0.561, 0.813) | < 0.001 | 1.000                      | 0.003                       | 0.984                                     |
| Well-Being Composite, IRT <sup>‡</sup> | 0.598                                      | (0.469, 0.726) | < 0.001 | 1.000                      | 0.002                       | 1.000                                     |
| <u>Classical Test Theory</u>           |                                            |                |         |                            |                             |                                           |
| Overall Composite, CTT <sup>§</sup>    | 0.931                                      | (0.841, 1.022) | < 0.001 | < 0.001                    | < 0.001                     | 1.000                                     |
| Driving Difficulties <sup>  </sup>     | 1.502                                      | (1.306, 1.698) | < 0.001 | < 0.001                    | < 0.001                     | < 0.001                                   |
| Vision-Related Dependency              | 1.310                                      | (1.166, 1.454) | < 0.001 | < 0.001                    | < 0.001                     | 1.000                                     |
| Peripheral Vision                      | 1.138                                      | (1.011, 1.266) | < 0.001 | < 0.001                    | < 0.001                     | 1.000                                     |
| Vision-Related Mental Health           | 1.147                                      | (0.976, 1.318) | < 0.001 | 0.264                      | < 0.001                     | 1.000                                     |
| Distance Vision                        | 1.033                                      | (0.916, 1.151) | < 0.001 | < 0.001                    | < 0.001                     | 0.652                                     |
| Vision-Related Role Function           | 0.998                                      | (0.830, 1.167) | < 0.001 | 1.000                      | < 0.001                     | 1.000                                     |
| Near Vision                            | 0.844                                      | (0.711, 0.977) | < 0.001 | 0.005                      | < 0.001                     | 0.652                                     |
| Vision-Related Social Function         | 0.893                                      | (0.805, 0.980) | < 0.001 | < 0.001                    | < 0.001                     | 1.000                                     |
| Color Vision                           | 0.843                                      | (0.752, 0.935) | < 0.001 | < 0.001                    | < 0.001                     | 1.000                                     |
| Ocular Pain                            | 0.697                                      | (0.537, 0.858) | < 0.001 | 0.264                      | < 0.001                     | 1.000                                     |
| General Vision                         | 0.262                                      | (0.125, 0.399) | < 0.001 | 0.264                      | 0.003                       | 1.000                                     |
| <u>General Health Item</u>             |                                            |                |         |                            |                             |                                           |
| General Health                         | 0.395                                      | (0.194, 0.596) | < 0.001 | 0.311                      | 0.064                       | 1.000                                     |

<sup>§</sup>Composite score is an un-weighted mean of the 12 subscale scores (excluding general health).

<sup>||</sup>Scores could be generated for only 3,816 Latinos who reported that they were currently driving or had driven in the past.
